# Supplementary material for: Entwicklung der alpinen Abflussregime in Österreich im Zeitraum 1961–2010
Source: Springer Nature journal article supplement (doi:10.1007/s00506-018-0499-z), 2018-07-02

# Gleitende 10-Jahres-Mittelwerte der Pardé-Koeffizienten für den Zeitraum 1961-2010

Online-Zusatzinformation zum Artikel "Entwicklung der alpinen Abflussregime in Österreich im Zeitraum 1961-2010" von K. Lebedzinski und J. Fürst. ÖWAV 2018

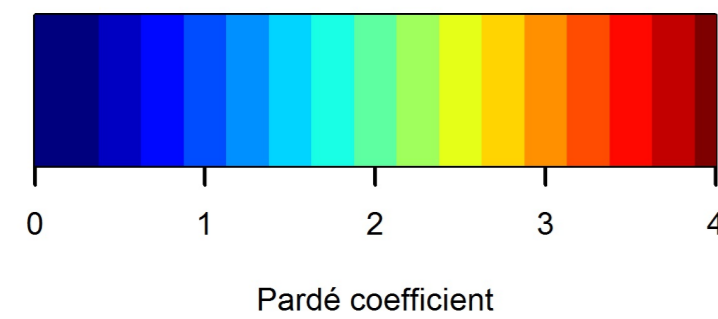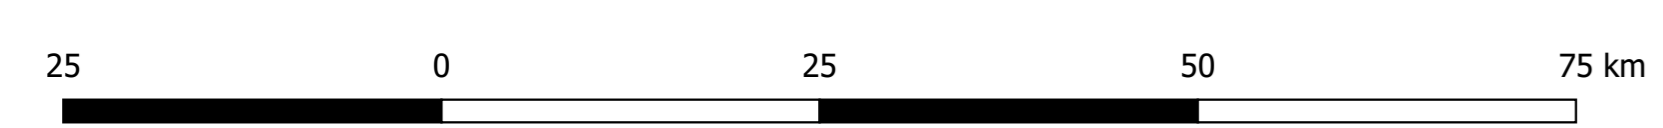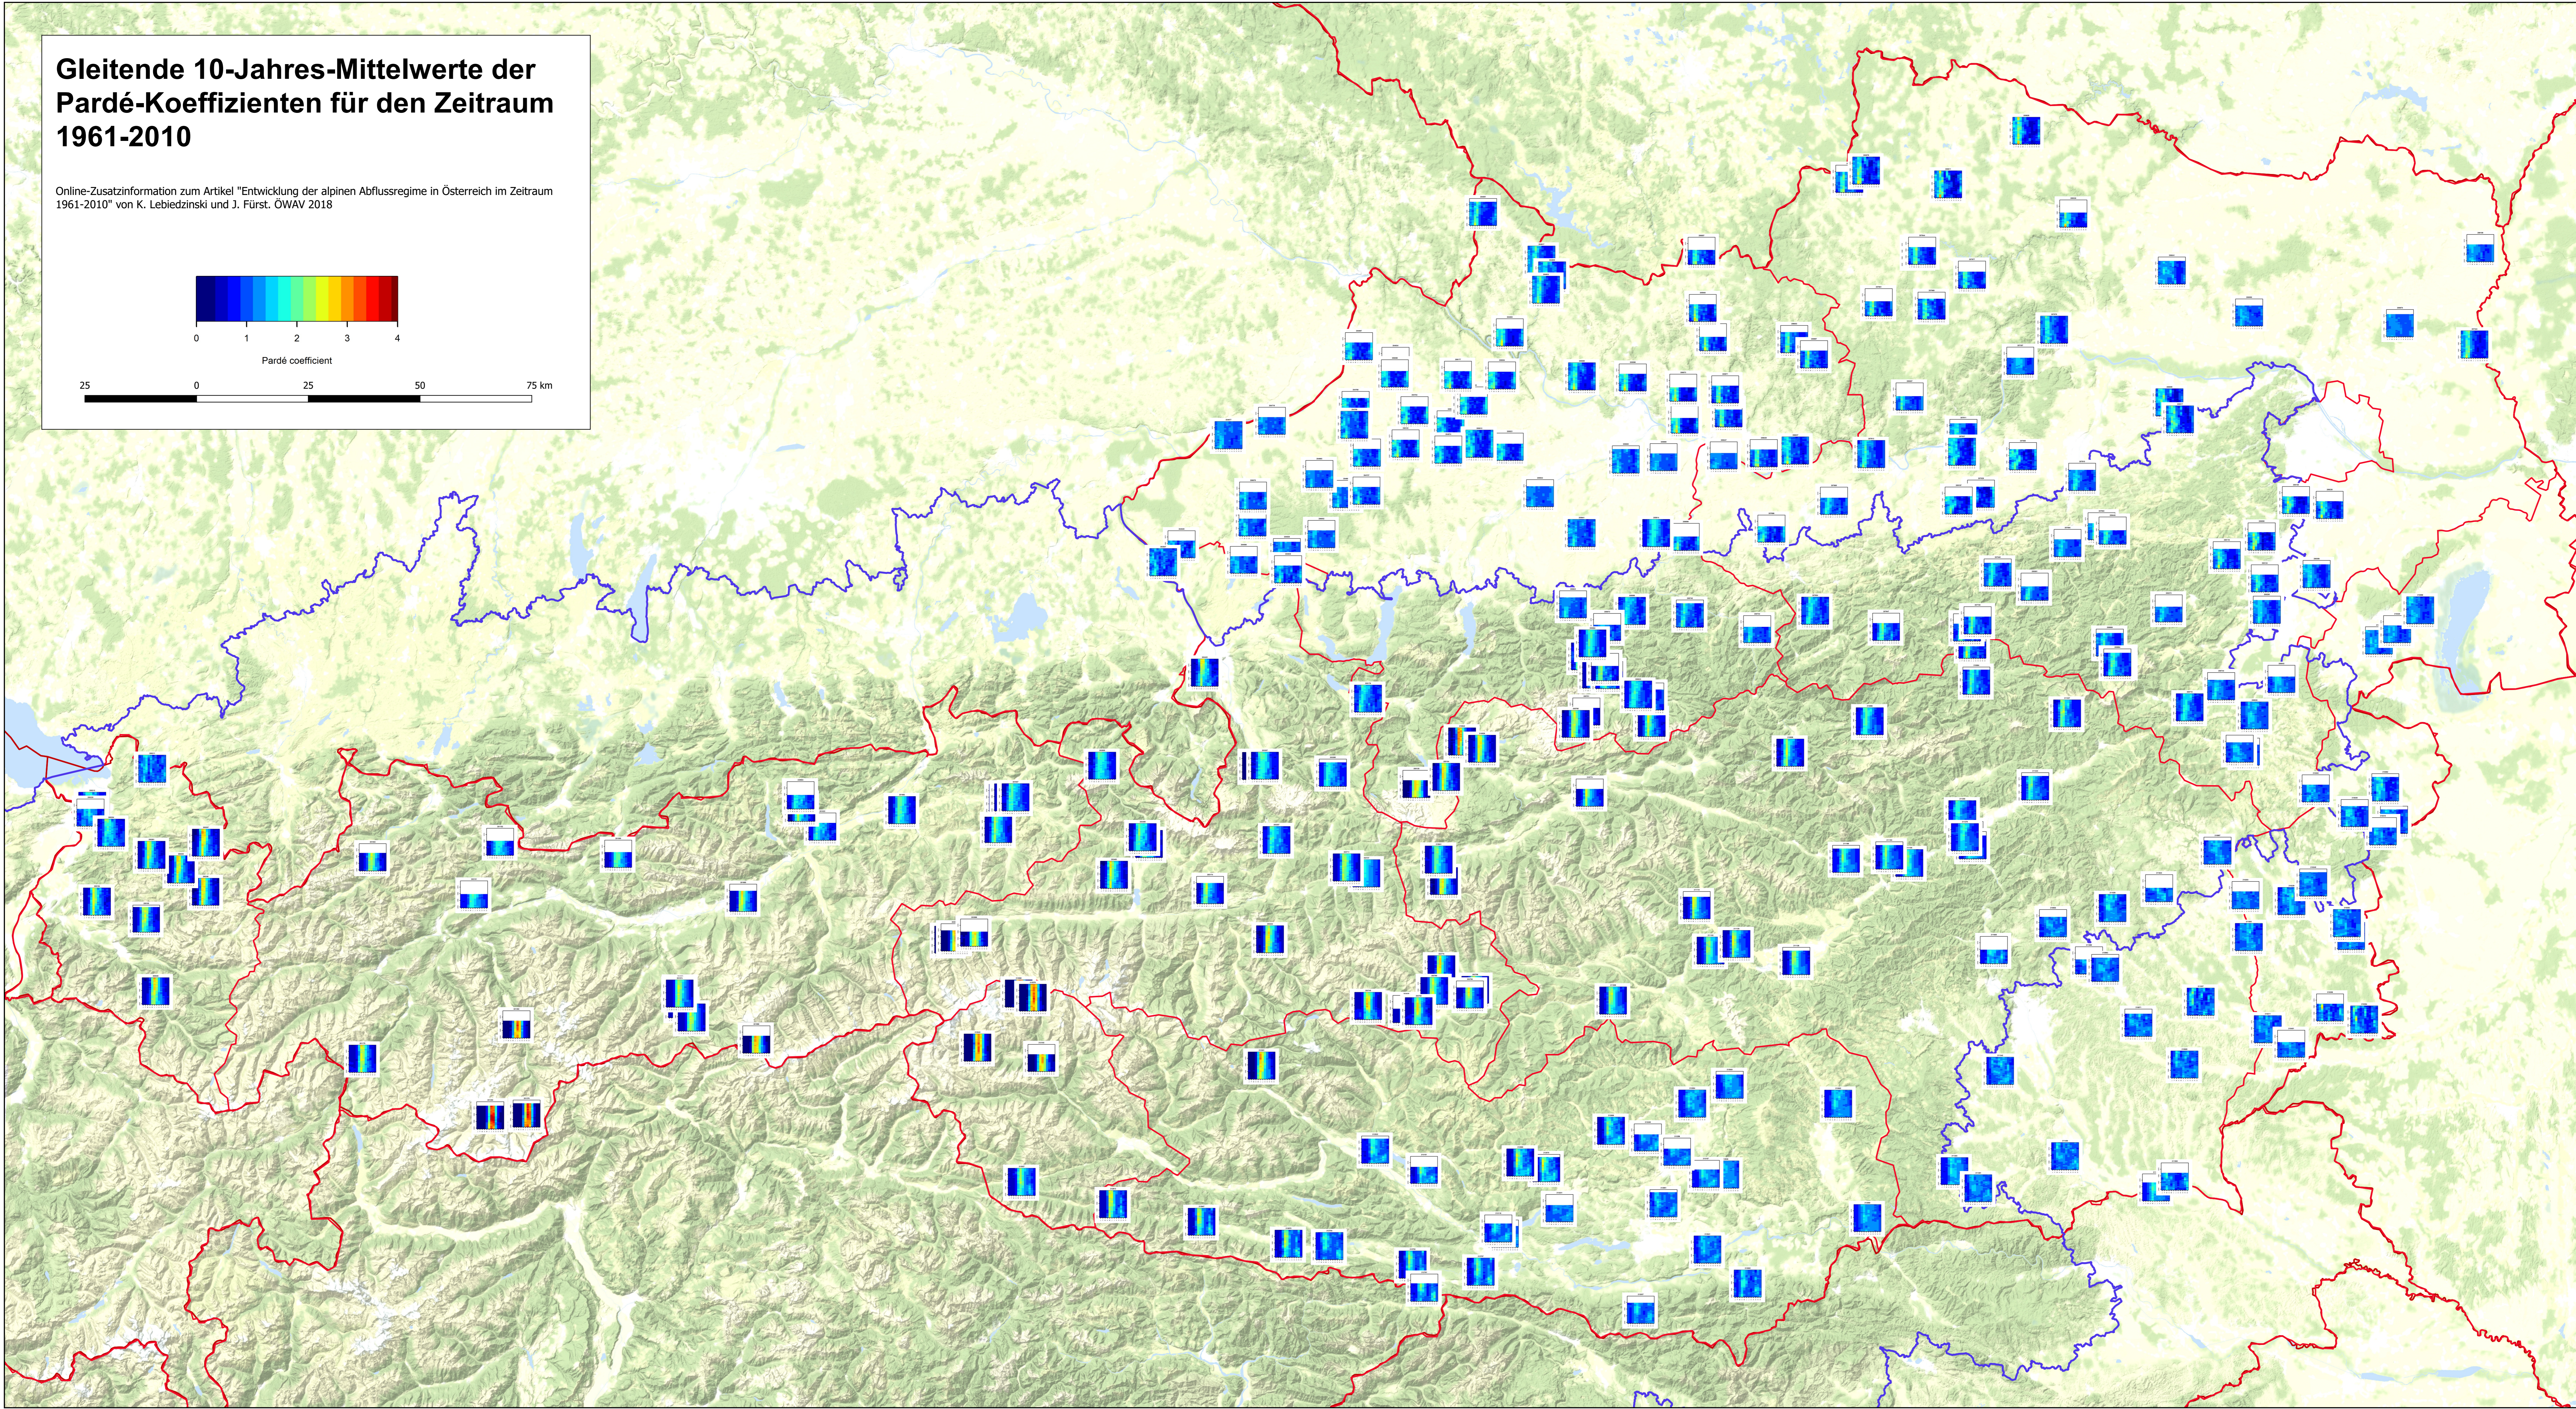

Supplement: MOESM1 [file 15902076]
